# Supplementary material for: Novel Model for Comprehensive Assessment of Robust Prognostic Gene Signature in Ovarian Cancer Across Different Independent Datasets
Source: Front Genet. 2019 Oct 11;10:931. doi: 10.3389/fgene.2019.00931 (PMC6798149; doi:10.3389/fgene.2019.00931)
Supplement: Table S2 — The results of the performance of combination 1 model across 16 independent datasets (WRT). [file Table_2.xlsx]

## Sheet: Sheet1
Dataset	painents	event	HR	95%CI: Low	95%CI: Up	pvalue	median NPI	logrank	Chi-sq	c-Index	AUC 5 years	AUC 3 years	lowrisk	highrisk	matchGENES/PROBES
TCGA(affy)	508	249	1.54668	1.366	1.751	5.96e-12	-0.0409479	3.862e-12	2.29e-07	0.656	0.699459	0.728969	254	254	379
TCGA(Hi-seq)	364	193	1.44258	1.249	1.666	6.16e-07	-0.0536982	5.258e-07	0.000613	0.636	0.64544	0.682381	182	182	378
TCGA(GA450)	481	234	1.51609	1.332	1.726	3.16e-10	-0.069897	2.147e-10	4.63e-06	0.645	0.676671	0.700987	241	240	380
GEO-GSE14764	80	21	1.5044	0.9856	2.296	0.0584	-0.0908738	0.0566	0.0119	0.599	0.727157	0.596582	40	40	354/611
GEO-GSE9899	276	110	2.2467	1.8	2.804	8.15e-13	-0.0948095	2.273e-13	7.81e-07	0.727	0.707643	0.731015	138	138	355/840
GEO-GSE3149	116	68	1.4504	1.157	1.818	0.00124	0.0498544	0.001159	0.00624	0.646	0.68128	0.688617	58	58	354/611
GEO-GSE26193	107	76	1.2921	1.026	1.628	0.0296	-0.0207661	0.02888	0.0164	0.617	0.610088	0.677807	54	53	355/840
GEO-GSE26712	185	153	1.37411	1.172	1.611	9.22e-05	-0.00821448	8.776e-05	0.00157	0.618	0.468532	0.571429	93	92	354/611
GEO-GSE63885	70	66	1.33	1.035	1.71	0.0261	0.107347	0.0254	0.265	0.57	0.61176	0.604837	35	35	355/840
GEO-GSE18520	53	41	1.1144	0.8266	1.502	0.477	0.352119	0.4768	0.643	0.553	0.441867	0.559211	27	26	355/840
GEO-GSE17260	110	76	1.4109	1.114	1.787	0.00427	-0.0266563	0.004216	0.00724	0.637	0.680661	0.651248	55	55	50/51
GEO-GSE32062	260	121	1.4186	1.178	1.708	0.000219	-0.0811437	0.0002037	0.0023	0.603	0.651857	0.619708	130	130	377/614
GEO-GSE19161	61	32	1.09671	0.7533	1.597	0.63	-0.0606392	0.6299	0.682	0.541	0.493577	0.479416	31	30	28/28
GEO-GSE13876	415	302	1.13674	1.013	1.276	0.0297	0.0311323	0.02978	0.122	0.547	0.567074	0.547005	208	207	353/575
GEO-GSE19829-GPL570	28	17	1.7796	1.048	3.021	0.0328	-0.105485	0.02882	0.161	0.684	0.629899	0.819969	14	14	356/863
GEO-GSE19829-GPL8300	42	23	1.2261	0.793	1.896	0.359	0.215348	0.3585	0.0256	0.618	0.548561	0.666322	21	21	276/373
Patients: number of patient samples
event: Events at the end of follow-up
HR: Hazard ratio
95%CI: Low: The Lower Limit of Confidence Interval
95%CI: up: The upper limit of confidence interval
pvalue: p-value of Wald test
median NPI: median value of normalized prognostic index (NPI)
logrank: p-value of log-rank test
Chi-sq: Chi-square test
C-index: index of concordance
AUC 5 year: Five-year AUC value
AUC 3 year: Three-year AUC value
lowrisk: number of patients in lowrisk group/class
highrisk: number of patients in highrisk
matchGENES/PROBES: Number of matched genes / probes
